# Supplementary material for: Multifaceted Hi-C benchmarking: what makes a difference in chromosome-scale genome scaffolding?
Source: PubMed Central journal article supplement (PMC6952475; doi:10.1093/gigascience/giz158), 2020-01-10
Supplement: giz158_response_to_reviewer_comments_revision_1.pdf [file giz158_response_to_reviewer_comments_revision_1.pdf]

## Author's Response To Reviewer Comments

Close

We have uploaded a letter containing our response to the editor's and reviewer's request and comments.

Close
